# Supplementary material for: HepG2-Based Designer Cells with Heat-Inducible Enhanced Liver Functions
Source: MDPI journal article supplement (doi:10.3390/cells11071194), 2022-04-01
Supplement: s1 [file s1]

## Supplementary Figures

# **HepG2-Based Designer Cells with Heat-Inducible Enhanced Liver Functions**

Hiroyuki Kitano, Yoshinori Kawabe and Masamichi Kamihira \*

## Figure captions

**Figure S1.** Effect of heat treatment on cell growth and EGFP expression in HepG2-HSP cells. Cells were cultured at 37°C for 5 d after heat treatment at 41°C, 42°C, 43°C, or 44°C for 0.5, 1, or 2 h. No heat treatment was set as the control. The number of viable cells (a) and percentage of EGFP-positive cells (b) were measured. Data are presented as means  $\pm$  standard deviations ( $n = 3$ ); \* $P < 0.05$ , \*\* $P < 0.01$  vs. control. C, control; EGFP, enhanced green fluorescent protein; N.D., not detected.

**Figure S2.** Liver function analyses of HepG2 and HepG2/8F\_HS bulk cells in monolayer culture. The number of cells (a), albumin secretion rate (b), ammonia removal rate (c), and cytochrome P450 (CYP3A4) activity (d) were measured during the culture of HepG2 (circles) and HepG2/8F\_HS bulk (squares) cells with (red symbols) or without (blue symbols) heat treatment. Data are presented as means  $\pm$  standard deviations ( $n = 3$ ); \* $P < 0.05$ , \*\* $P < 0.01$  vs. without heat treatment.

**Figure S3.** Liver function analyses of HepG2/8F\_HS clones in monolayer culture. The number of cells (a), albumin secretion rate (b), and ammonia removal rate (c) were measured with (red columns) or without (blue columns) heat treatment on day 5.

**Figure S4.** Western blot analysis of eight liver-enriched transcription factors in HepG2/8F\_HS cells. Cells were seeded into collagen-coated 100-mm dishes and exposed to heat treatment at 43°C for 30 min when the cell density reached 80% confluency. Three days after heat treatment, cells were detached from the dish using trypsin and collected by centrifugation. The cells were suspended in PBS containing 1 mM PMSF (P7626; Sigma-Aldrich) and disrupted by sonication. Cell lysate samples were applied for Wes automated capillary western blotting (Model No. 004-600A-N001; ProteinSimple, San Jose, CA, USA). Primary antibodies were purchased from Santa Cruz Biotechnology (anti-HNF-1 $\alpha$ , sc-393668; anti-HNF-1 $\beta$ , sc-130407; anti-HNF-3 $\beta$ , sc-101060; anti-HNF-4 $\alpha$ , sc-374227; anti-HNF-6, sc-376167; anti-C/EBP- $\alpha$ , sc-166258; anti-C/EBP- $\beta$ , sc-7962; and anti-C/EBP- $\gamma$ , sc-517003) or Cell Signaling Technology (anti-GAPDH, #2118). Anti-mouse secondary antibody was purchased from ProteinSimple (042-205).

**Figure S5.** Microscopy images showing EGFP expression by heat-treated HepG2/8F\_HS cells. Cells were cultured for 9 d after heat treatment with (Sort[+]) or without (Sort[-]) sorting. Scale bars = 100  $\mu$ m.

**Figure S6.** Heatmap analysis of liver-related gene expression in HepG2 and HepG2/8F\_HS cells with (HS[+]) or without (HS[-]) heat treatment in monolayer and spheroid cultures. Gene names used for analysis in Figure 6a are listed in the right column.

**Figure S7.** Relative gene expression of liver-related genes in HepG2 and HepG2/8F\_HS cells. (a) Drug metabolism response-related genes. (b) Urea cycle enzyme genes. Cells were cultured with (red columns) or without (blue columns) heat treatment. M, monolayer; S, spheroid.

**Figure S8.** Gene ontology (GO) analysis of genes with more than 2-fold increase in adult primary human hepatocytes (HC5-25) compared with HepG2. Microarray data of HC5-25 cells (GSM3963162) were obtained from the Gene Expression Omnibus of the National Center for Biotechnology Information. The five most significantly ( $P < 0.05$ ) enriched GO terms in the biological process (BP), cellular component (CC), and molecular function (MF) categories are presented.

**Figure S9.** Heatmap analysis of liver-related gene expression of HepG2 and heat-treated HepG2/8F\_HS cells in comparison with primary human hepatocytes. DNA microarray data for 187271 (GSM3963168), JFC (GSM3927233) and HC5-25 (GSM3963162) cells were obtained from the Gene Expression Omnibus of the National Center for Biotechnology Information. Hierarchical clustering was analyzed using the Pearson's correlation distance/average linkage method.

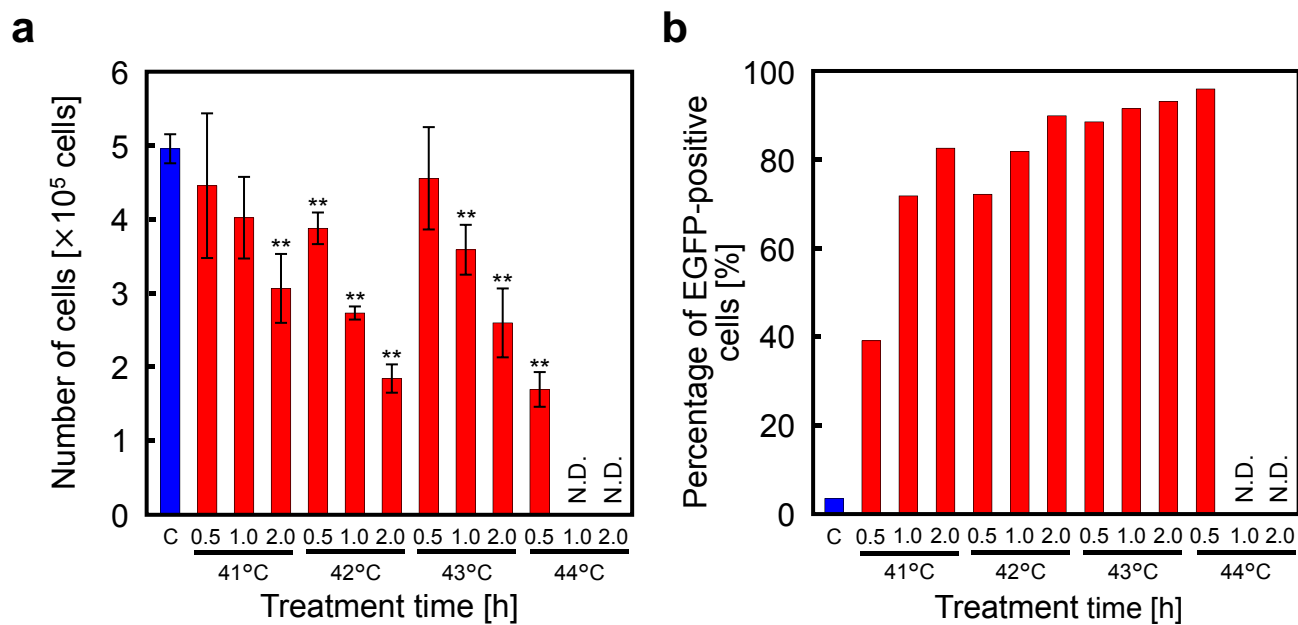

Figure S1. Kitano *et al.*

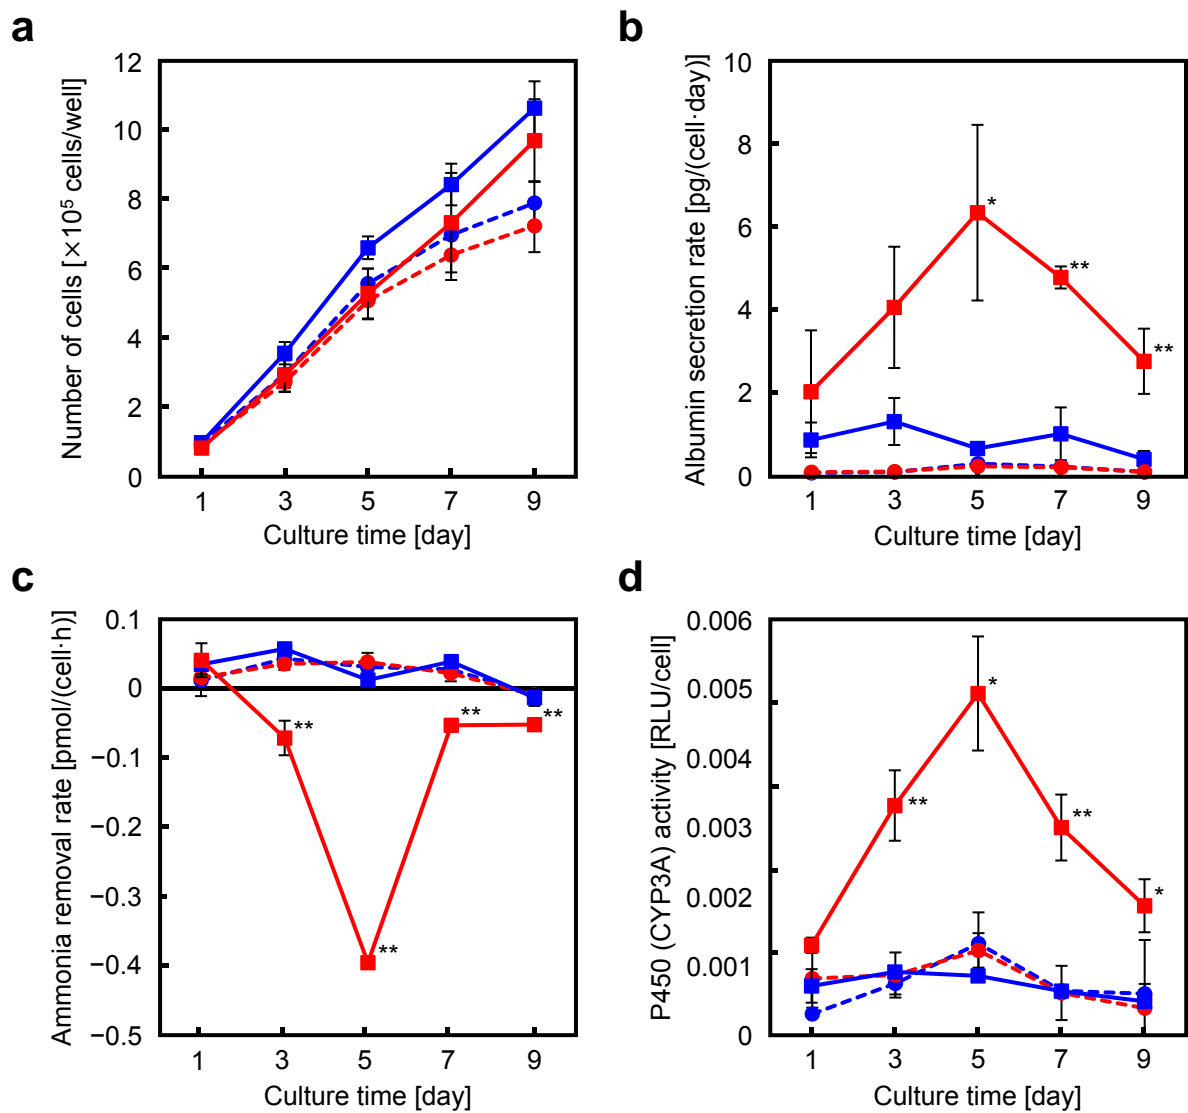

Figure S2. Kitano *et al.*

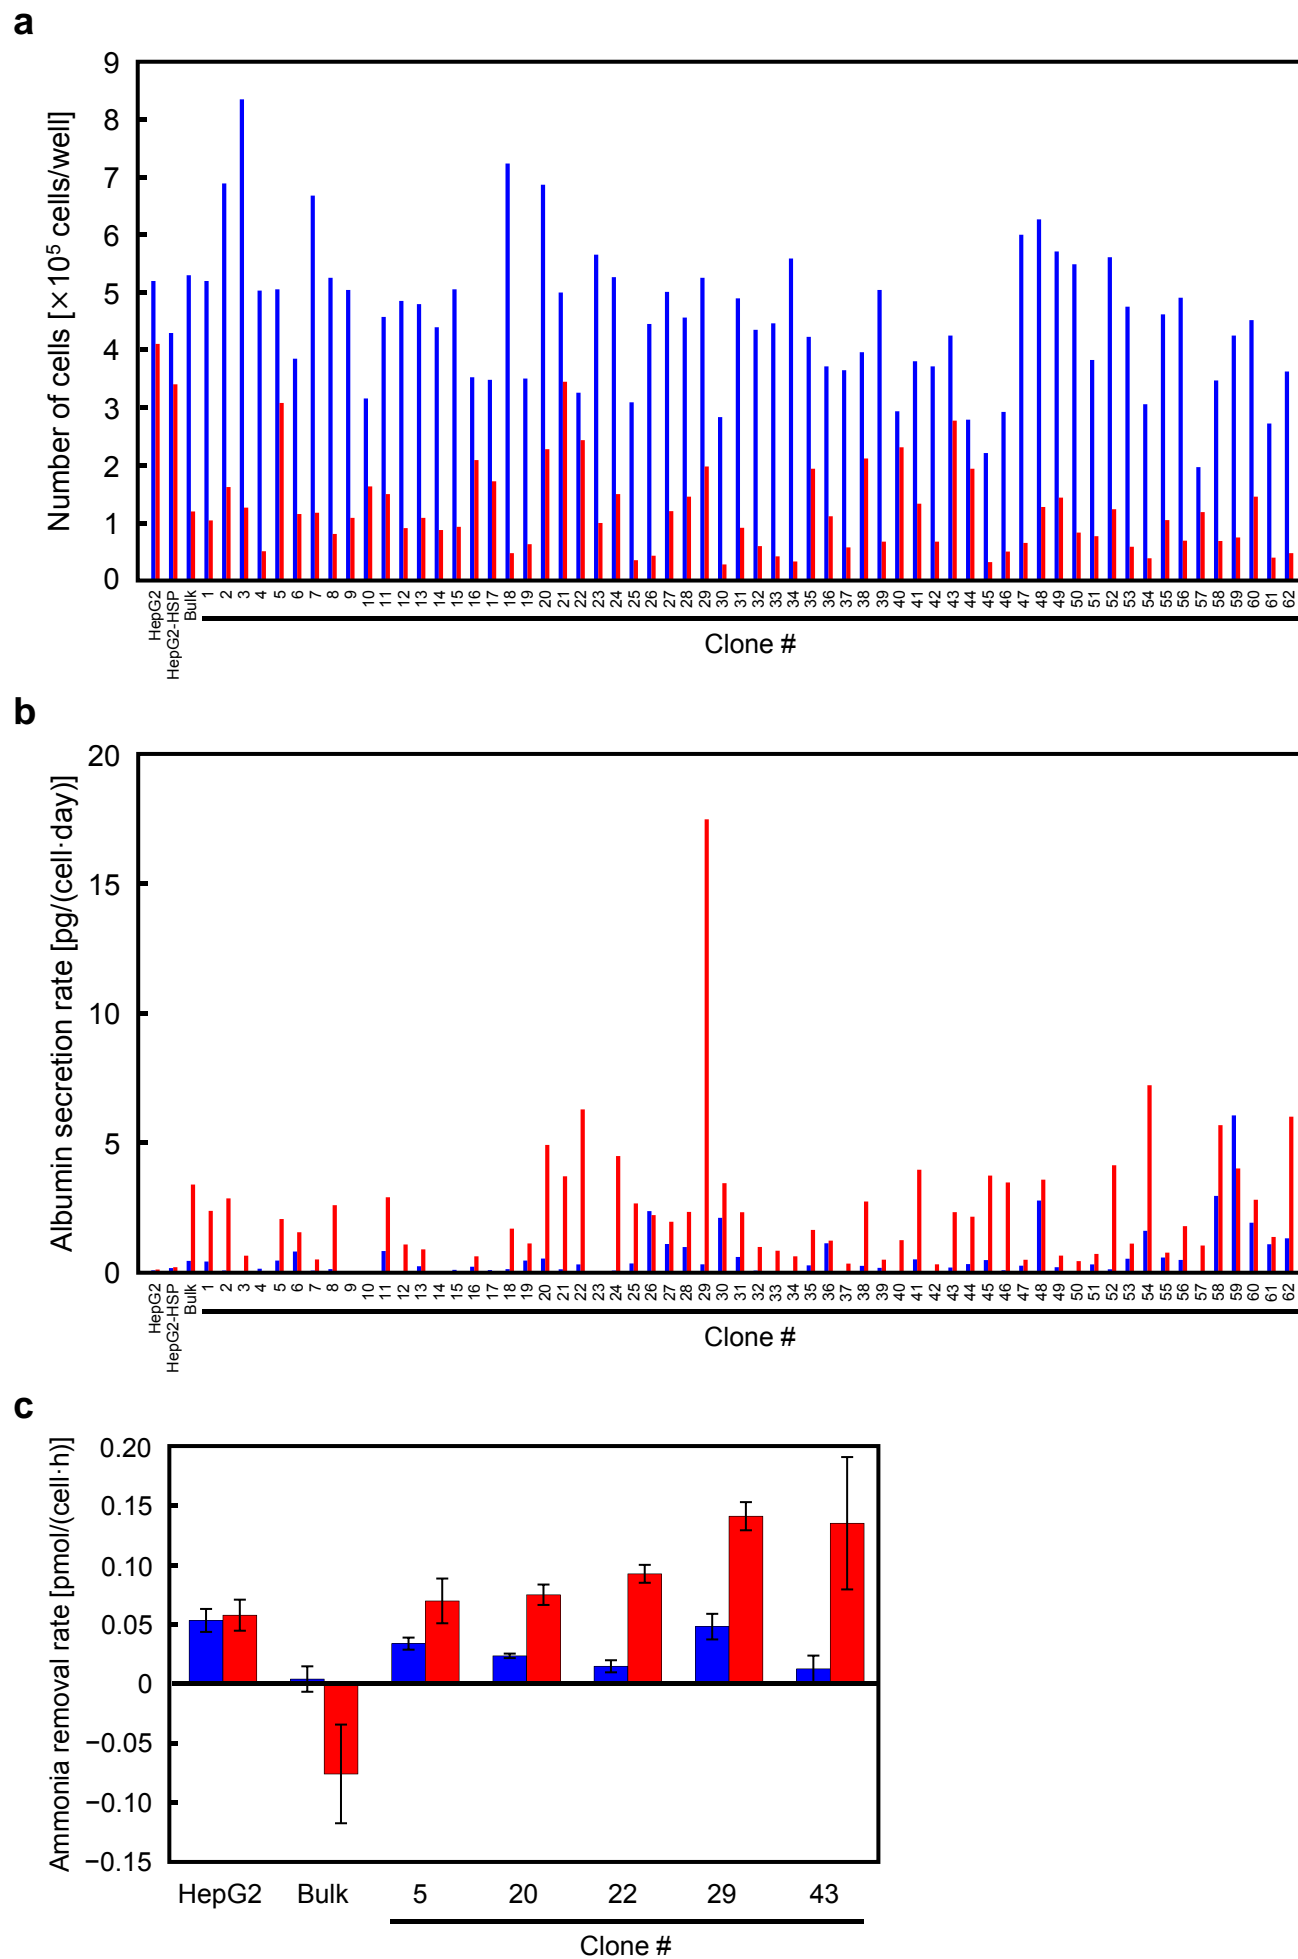

Figure S3. Kitano *et al.*

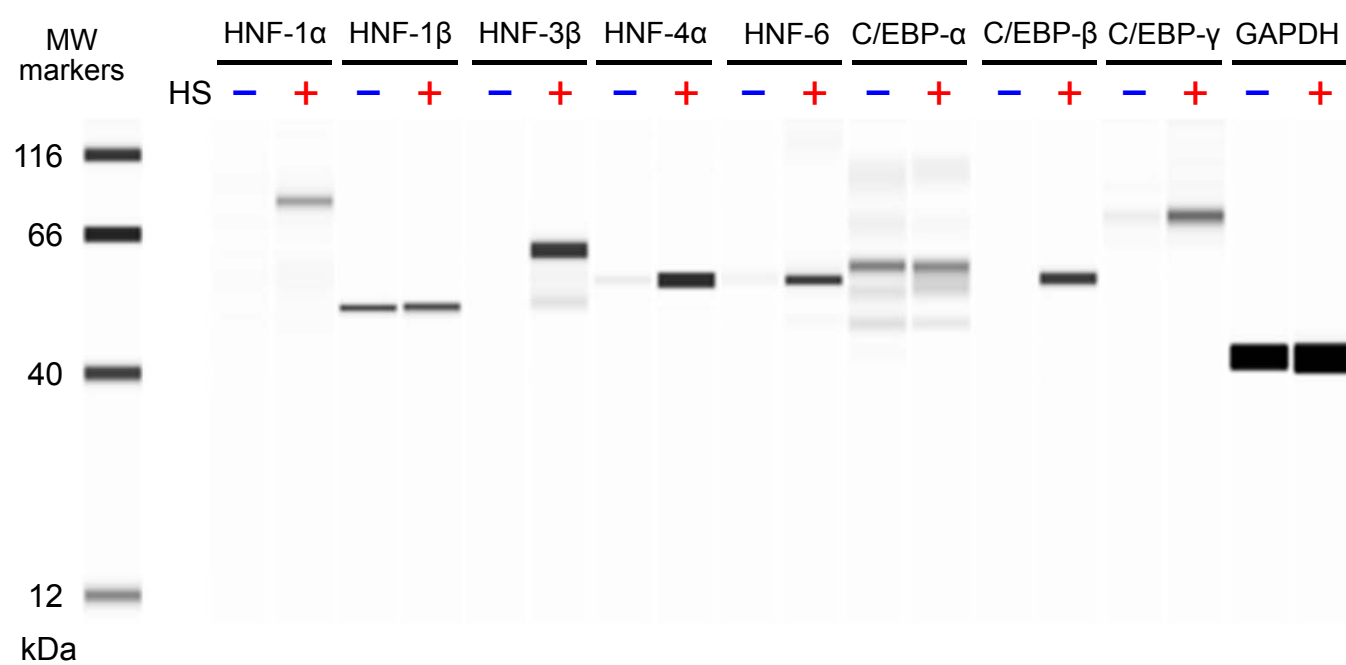

Figure S4. Kitano *et al.*

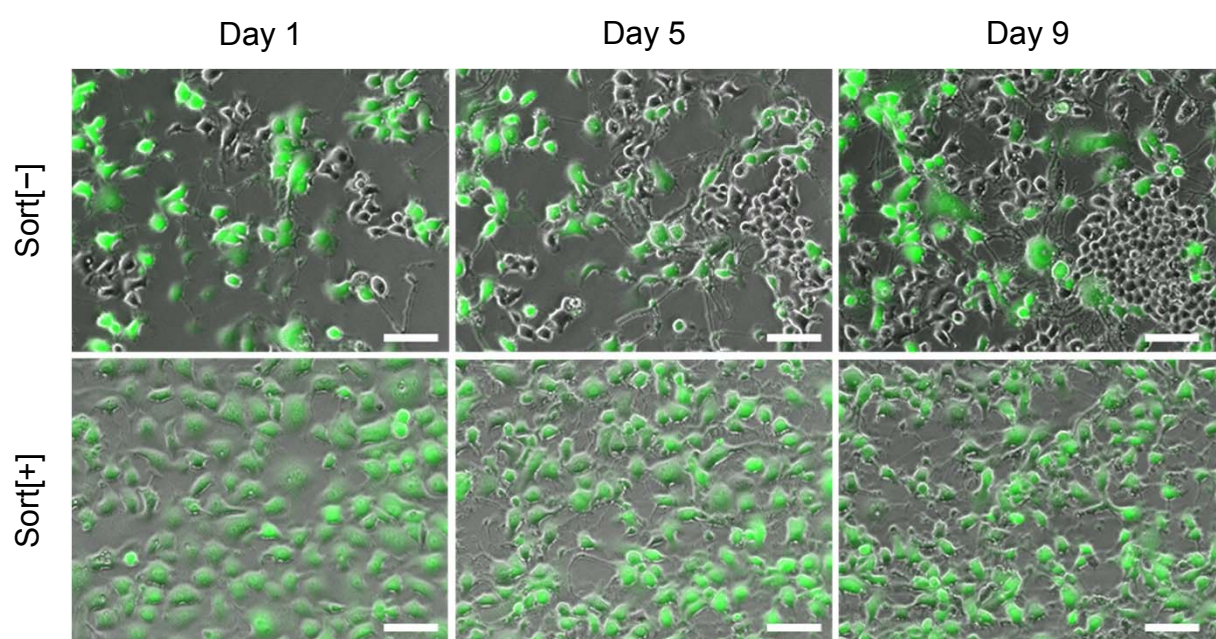

Figure S5. Kitano *et al.*



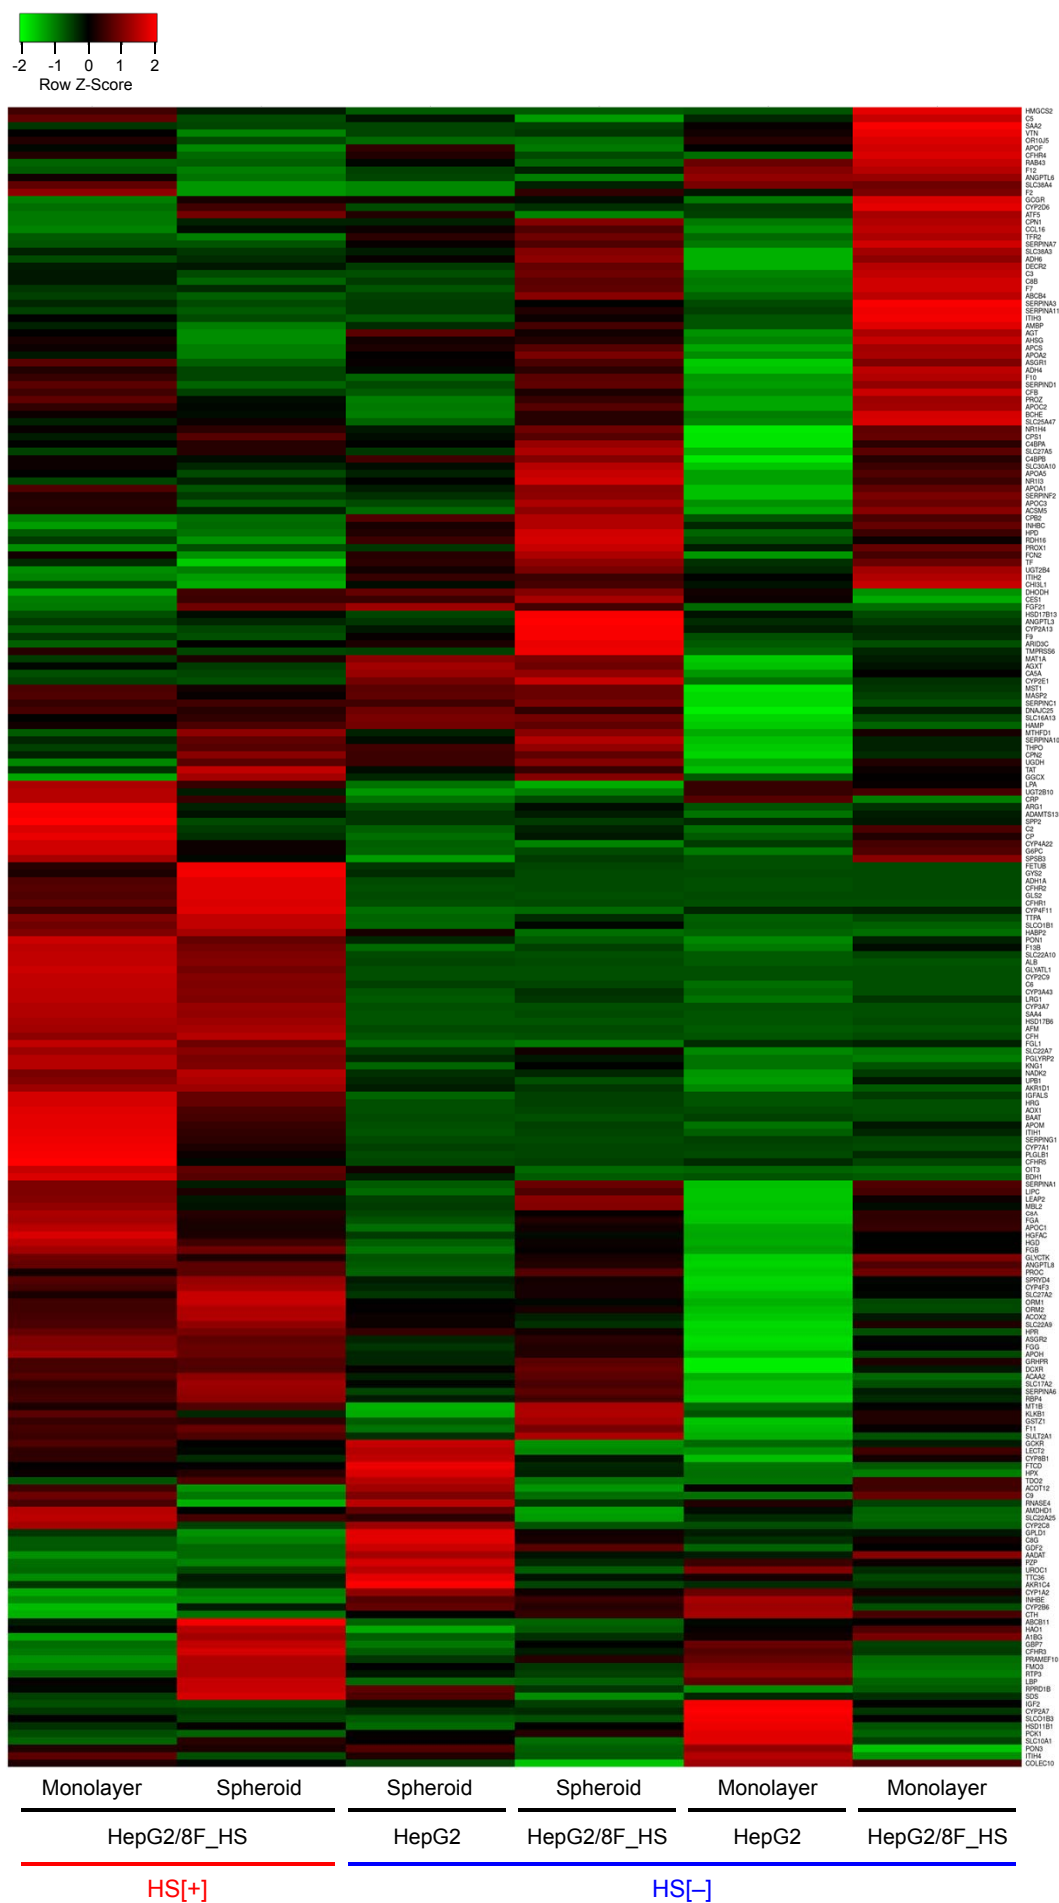Figure S6. Kitano *et al.*

**a**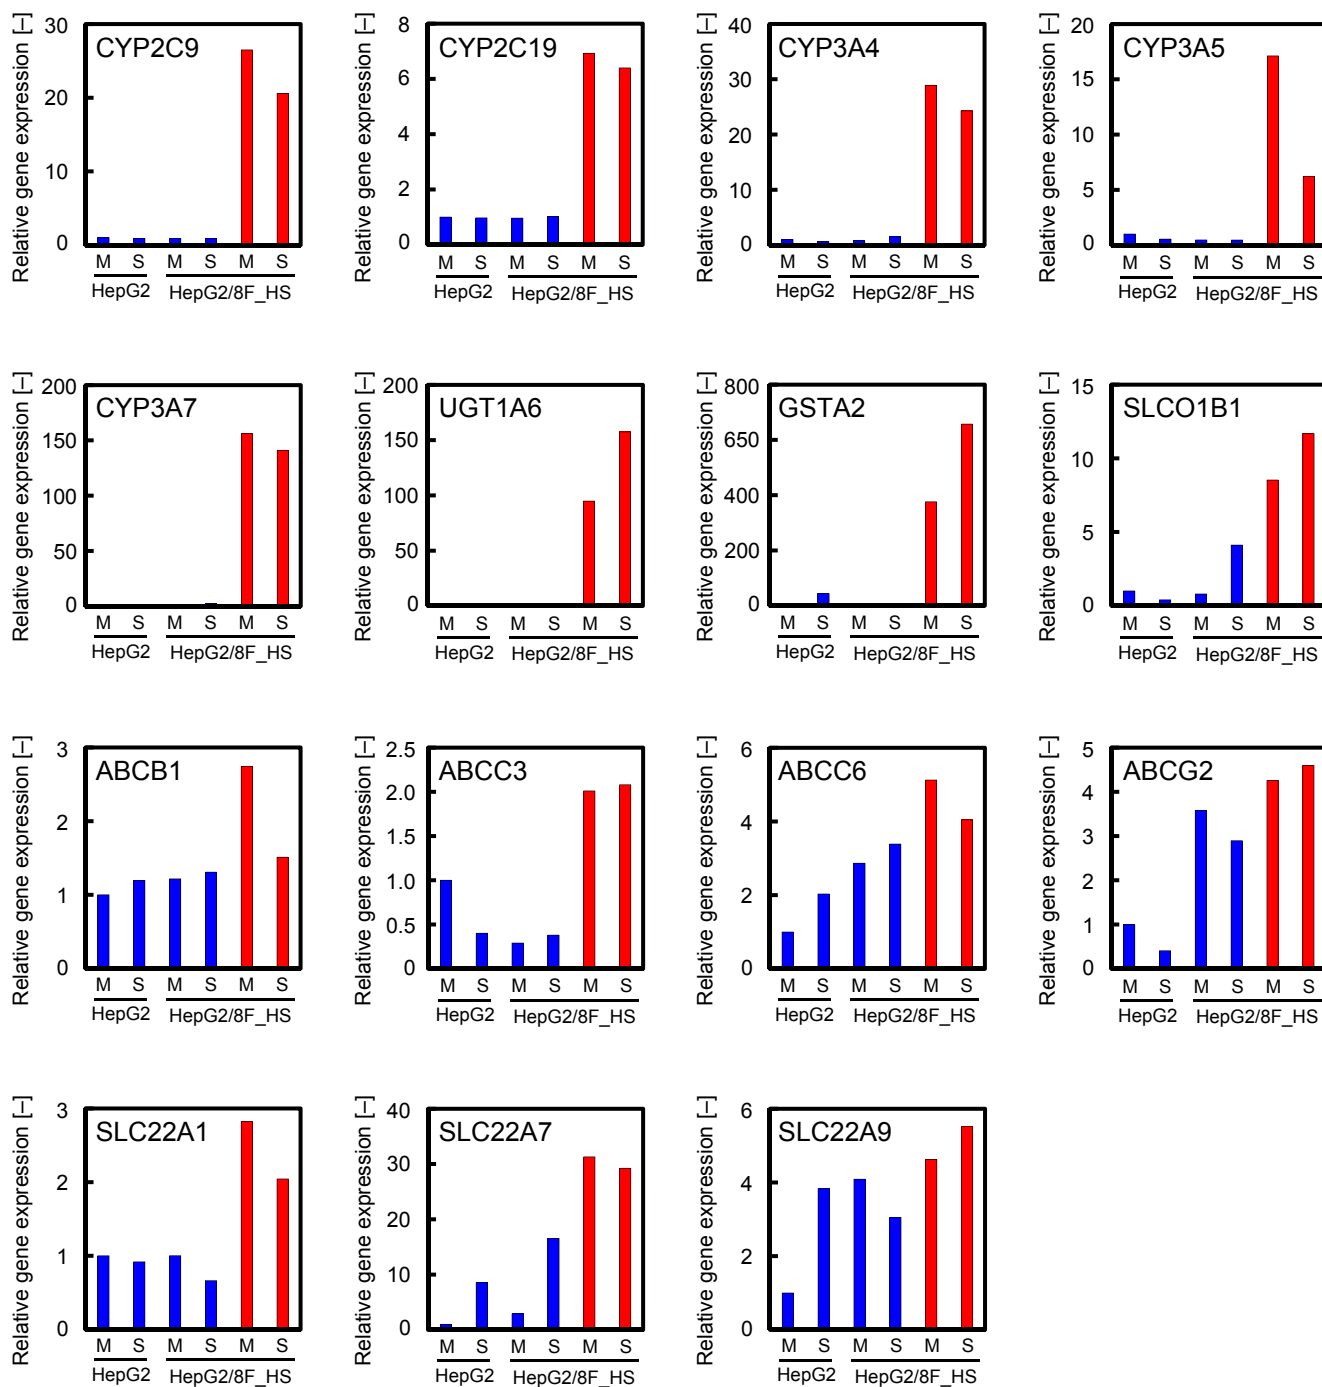**b**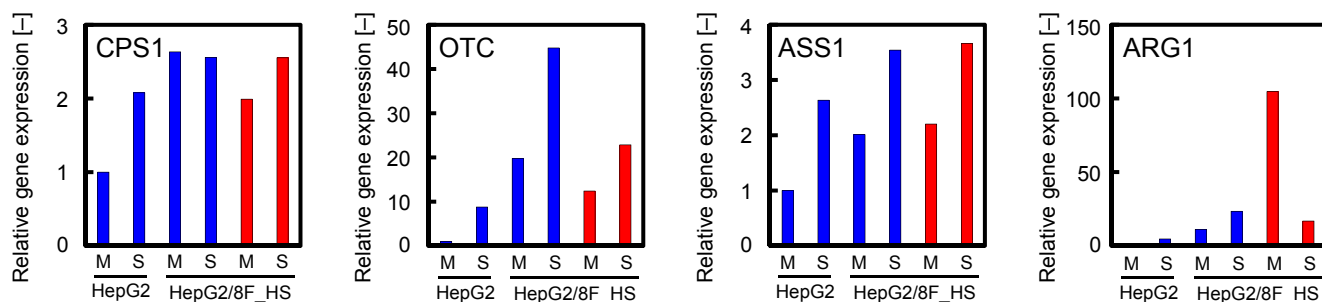Figure S7. Kitano *et al.*

Adult primary human hepatocytes (HC5-25) vs HepG2 monolayer

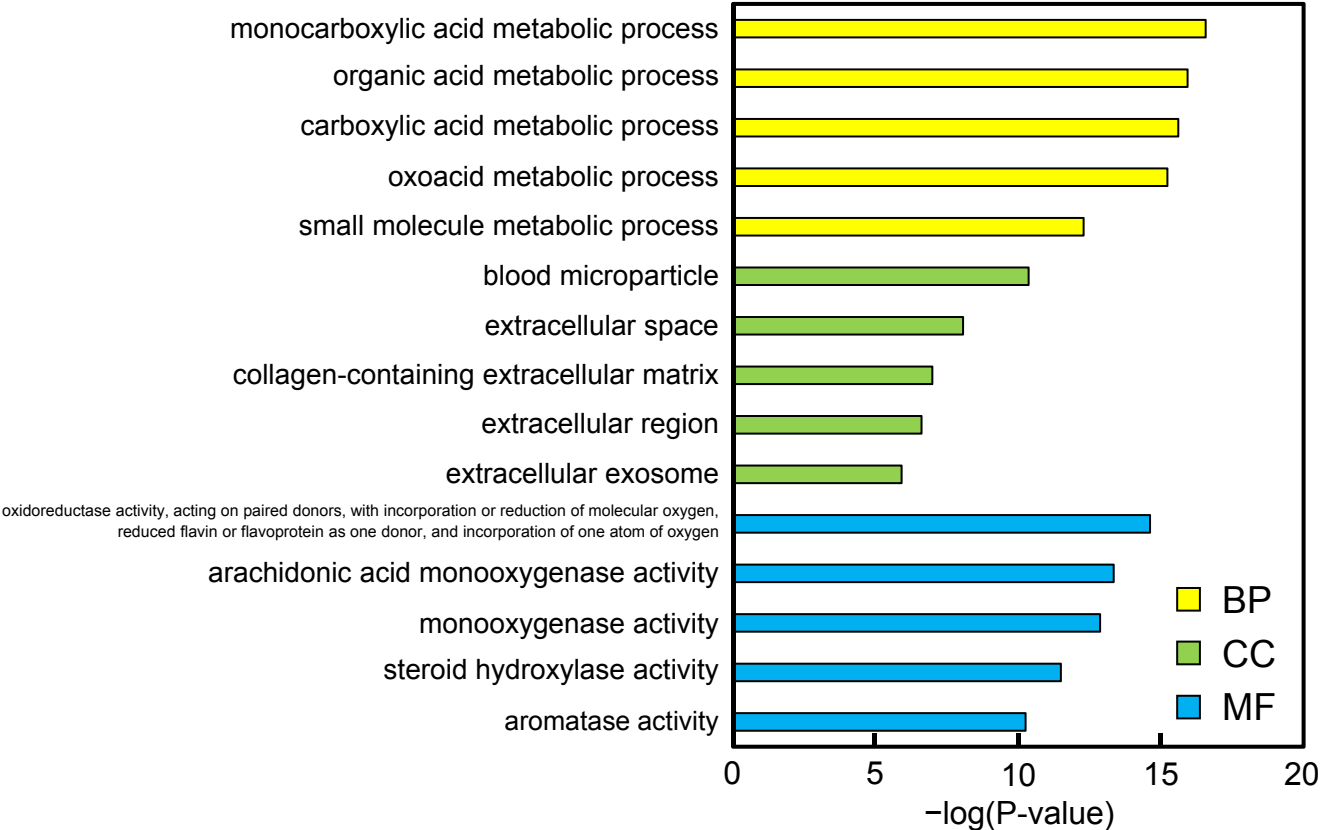

Figure S8. Kitano *et al.*
